# Supplementary material
Source: Copernicus journal article supplement (doi:10.5194/acp-26-9083-2026)
Supplement: Supplementary file [file acp-26-9083-2026-supplement-title-page.pdf › acp-26-9083-2026-supplement-title-page.pdf]

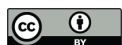

## *Supplement of*

# **Quantification of inmixing of Asian Monsoon air by multi-species classification in a match flight experiment**

**Jan Kaumanns et al.**

*Correspondence to:* Jan Kaumanns (j.kaumanns@fz-juelich.de)

- acp-26-9083-2026-supplement-title-page.pdf
- CFC-12\_hex1.html
- CFC-12\_hex2.html
- H2O\_hex1.html
- H2O\_hex2.html
- HNO3\_hex1.html
- HNO3\_hex2.html
- O3\_hex1.html
- O3\_hex2.html
- PAN\_hex1.html
- PAN\_hex2.html
- labels\_hex1.html
- labels\_hex2.html
- transitions\_hex1\_1.html
- transitions\_hex1\_2.html
- transitions\_hex2\_1.html
- transitions\_hex2\_2.html

The copyright of individual parts of the supplement might differ from the article licence.
